# Supplementary material for: Solution-processed high-haze ZnO pyramidal textures directly grown on a TCO substrate and the light-trapping effect in Cu2O solar cells
Source: Royal Society of Chemistry journal article supplement (doi:10.1039/c3tc32413c), 2014-01-01
Supplement: c3tc32413c1.pdf [file c3tc32413c1.pdf]

## Solution-Processed High-Haze ZnO Pyramidal Textures Directly Grown on a TCO substrate and Light-Trapping Effect in Cu<sub>2</sub>O Solar Cells

Tsutomu Shinagawa,<sup>\*a</sup> Kosuke Shibata,<sup>b</sup> Osamu Shimomura,<sup>b</sup> Masaya Chigane,<sup>a</sup> Ryôki Nomura<sup>b</sup>  
and Masanobu Izaki<sup>c</sup>

<sup>a</sup>Electronic Materials Research Division, Osaka Municipal Technical Research Institute, Osaka 536-8553, Japan.

<sup>b</sup>Department of Applied Chemistry, Osaka Institute of Technology, Osaka 535-8585, Japan.

<sup>c</sup>Department of Mechanical Engineering, Toyohashi University of Technology, Toyohashi, Aichi 441-8580, Japan.

\*E-mail: tshina@omtri.or.jp

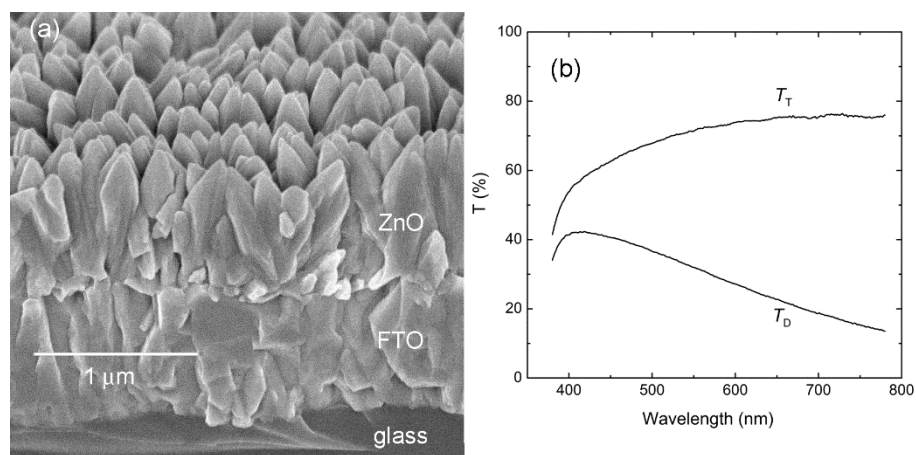

**Figure S1.** (a) FESEM image and (b)  $T_T$  and  $T_D$  spectra of a ZnO film electrodeposited from a 15 mM Zn(NO<sub>3</sub>)<sub>2</sub>·6H<sub>2</sub>O–15 mM NaCl aqueous solution at a current density of 2.0 mA cm<sup>-2</sup> for 450 s.

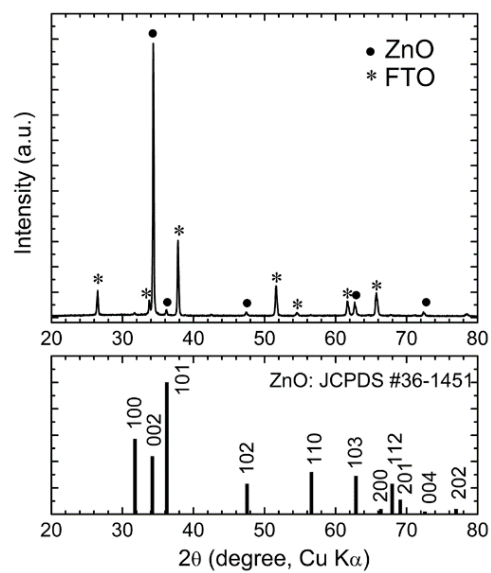

**Figure S2.** XRD pattern of a pyramidal-textured ZnO film. JCPDS data (no. 36-1451) for ZnO is also presented.
